# Supplementary material
Source: PubMed Central journal article supplement (PMC2922695)
Supplement: NIHMS223806-supplement-1_si_001.pdf [file NIHMS223806-supplement-1_si_001.pdf]

Supporting information for

## **On the Interfragment Exchange in the X-Pol Method**

Alessandro Cembran, Peng Bao, Yingjie Wang,  
Lingchun Song,<sup>\*</sup> Donald G. Truhlar,<sup>\*</sup> and Jiali Gao<sup>\*</sup>

*Department of Chemistry and Minnesota Supercomputing Institute  
University of Minnesota, Minneapolis, MN 55455*

Computed total electronic energies and interaction energy components using the unpolarized (gas-phase),  $\psi_1^0\psi_2^0\psi_3^0$ , and polarized (cluster),  $\psi_1\psi_2\psi_3$ , monomer wave functions for two water trimer complexes, one at the cyclic, minimum energy configuration (**c-W<sub>3</sub>**) and another that includes a symmetrically placed, repulsive pair (**s-W<sub>3</sub>**). The 6-31+G(d) basis set were used in all calculations and energies are give in hartrees.

Table S1. Computed total energies and energy components (in hartrees) for the cyclic water trimer minimum structure (**c-W<sub>3</sub>**) and for a symmetric trimer geometry (**s-W<sub>3</sub>**). All calculations were performed using HF/6-31+G(d).

| Method                                                  | <b>c-W<sub>3</sub></b> | <b>s-W<sub>3</sub></b> |
|---------------------------------------------------------|------------------------|------------------------|
| $E(\psi_a^0) + E(\psi_b^0) + E(\psi_c^0)$               | -228.05297             | -228.05318             |
| $E_{\text{Coulomb}}(\psi_1^0 \psi_2^0 \psi_3^0)$        | -228.09376             | -228.07863             |
| $E_{\text{BLW}}(\hat{A} \psi_1^0 \psi_2^0 \psi_3^0 \})$ | -228.06774             | -228.06150             |
| $E(\psi_1) + E(\psi_2) + E(\psi_3)$                     | -228.04723             | -228.05067             |
| $E_{\text{Coulomb}}(\psi_1 \psi_2 \psi_3)$              | -228.09790             | -228.07990             |
| $E_{\text{BLW}}(\hat{A} \psi_1 \psi_2 \psi_3 \})$       | -228.07286             | -228.06382             |
| $E_{\text{HF}}(\psi_{123})$                             | -228.07775             | -228.06724             |
